# Supplementary material
Source: PubMed Central journal article supplement (PMC5380476)

## Supplemental Material

### Common Genetic Variants Explain Variability in Drug-Induced QT Prolongation

David G. Strauss, MD, PhD, Jose Vicente, PhD, Lars Johannesen, PhD, Ksenia Blinova, PhD, Jay W. Mason, MD, Ray Woosley, MD, PhD, Peter Weeke, MD, PhD, Elijah R. Behr, MBBS, MD, Dan Roden, MD, Gulum Kosova, PhD, Michael A. Rosenberg, MD, Christopher Newton-Cheh, MD, MPH

#### Table of contents:

- Supplementary Table 1: Common genetic variants for QT score
- Supplementary Table 2: Baseline QTc vs. drug slope response by race
- Supplementary Table 3: Correlations between common genetic variant QT score and drug-induced  $T_{\text{peak}}-T_{\text{end}}$  slope response
- Supplementary Table 4: Baseline  $T_{\text{peak}}-T_{\text{end}}$  vs. drug QTc slope response by race
- Supplementary Table 5: Baseline  $T_{\text{peak}}-T_{\text{end}}$  vs. drug  $T_{\text{peak}}-T_{\text{end}}$  slope response by race
- Supplementary Table 6: Association results for individual torsade de pointes variants from the QT interval score
- Supplementary Table 7: Effects on QTc slope of genetic QT score using 61 SNPs at 31 loci (full) and restricted to 1 SNP per locus (index only)
- Supplementary Figure 1: Correlations between baseline QTc and QTc slope, genetic score and QTc slope as well as QTc slope between drugs
- Supplementary Figure 2: Validation of genotype score in cases of drug-induced torsade de pointes using index SNPs only

**Supplementary Table 1: Common genetic variants for QT score**

| SNP        | Chr. | Nearest Gene     | QT Raising Allele | European genetic QT score weight | African American genetic QT score weight | 0 copies (%) | 1 copy (%) | 2 copies (%) | Missing (%) |
|------------|------|------------------|-------------------|----------------------------------|------------------------------------------|--------------|------------|--------------|-------------|
| rs10919070 | 1    | ATP1B1           | A                 | 1.668                            | -2.063                                   | 0            | 13.6       | 86.4         | 0           |
| rs11809180 | 1    | ATP1B1           | C                 | 1.163                            | -1.574                                   | 0            | 18.2       | 77.3         | 4.5         |
| rs12061601 | 1    | ATP1B1           | T                 | 1.38                             | -1.888                                   | 9.1          | 13.6       | 72.7         | 4.5         |
| rs1983546  | 1    | ATP1B1           | A                 | 0.8174                           | -0.6946                                  | 36.4         | 31.8       | 31.8         | 0           |
| rs545833   | 1    | ATP1B1           | T                 | 0.8518                           | 0.4236                                   | 59.1         | 18.2       | 18.2         | 4.5         |
| rs12025136 | 1    | NOS1AP           | C                 | 1.449                            | 0.0336                                   | 50           | 18.2       | 27.3         | 4.5         |
| rs12143842 | 1    | NOS1AP           | T                 | 3.489                            | 3.144                                    | 50           | 31.8       | 0            | 18.2        |
| rs164133   | 1    | NOS1AP           | C                 | 0.706                            | -0.2965                                  | 50           | 40.9       | 4.5          | 4.5         |
| rs16857031 | 1    | NOS1AP           | G                 | 2.365                            | 0.7958                                   | 68.2         | 9.1        | 4.5          | 18.2        |
| rs17460657 | 1    | NOS1AP           | A                 | 4.997                            | 0.3507                                   | 0            | 13.6       | 81.8         | 4.5         |
| rs347272   | 1    | NOS1AP           | A                 | 1.804                            | -0.3486                                  | 59.1         | 22.7       | 0            | 18.2        |
| rs3934467  | 1    | NOS1AP           | T                 | 2.759                            | 1.688                                    | 59.1         | 22.7       | 0            | 18.2        |
| rs4656345  | 1    | NOS1AP           | G                 | 4.845                            | -4.709                                   | 4.5          | 0          | 86.4         | 9.1         |
| rs2273042  | 1    | RNF207           | A                 | 0.9223                           | -0.6483                                  | 77.3         | 13.6       | 0            | 9.1         |
| rs846111   | 1    | RNF207           | C                 | 1.69                             | 0.6535                                   | 59.1         | 27.3       | 0            | 13.6        |
| rs2298632  | 1    | TCEA3            | T                 | 0.7924                           | 0.6809                                   | 45.5         | 31.8       | 18.2         | 4.5         |
| rs12997023 | 2    | SLC8A1           | T                 | 1.694                            | -1.675                                   | 4.5          | 4.5        | 77.3         | 13.6        |
| rs6544311  | 2    | SLC8A1           | A                 | 0.6505                           | -0.9235                                  | 50           | 40.9       | 9.1          | 0           |
| rs938291   | 2    | SP3              | G                 | 0.5482                           | 0.3565                                   | 27.3         | 36.4       | 13.6         | 22.7        |
| rs295140   | 2    | SPATS2L          | T                 | 0.5534                           | 0.358                                    | 31.8         | 40.9       | 13.6         | 13.6        |
| rs7561149  | 2    | TTN-<br>CCDC141  | T                 | 0.5287                           | -0.3299                                  | 18.2         | 22.7       | 45.5         | 13.6        |
| rs17784882 | 3    | C3ORF75          | C                 | 0.5342                           | 0.1658                                   | 13.6         | 22.7       | 54.5         | 9.1         |
| rs11708996 | 3    | SCN5A-<br>SCN10A | G                 | 0.9123                           | -2.919                                   | 0            | 18.2       | 77.3         | 4.5         |
| rs6793245  | 3    | SCN5A-<br>SCN10A | G                 | 1.107                            | -0.5121                                  | 13.6         | 27.3       | 45.5         | 13.6        |
| rs6801957  | 3    | SCN5A-<br>SCN10A | C                 | 0.6181                           | -0.9547                                  | 4.5          | 31.8       | 50           | 13.6        |
| rs9851710  | 3    | SCN5A-<br>SCN10A | C                 | 0.6628                           | 0.1167                                   | 45.5         | 31.8       | 9.1          | 13.6        |
| rs2363719  | 4    | SLC4A4           | A                 | 0.9567                           | -0.5002                                  | 86.4         | 9.1        | 0            | 4.5         |
| rs3857067  | 4    | SMARCD1          | T                 | 0.5091                           | -0.1312                                  | 18.2         | 31.8       | 27.3         | 22.7        |
| rs10040989 | 5    | GFRA3            | G                 | 0.8571                           | 0.0051                                   | 4.5          | 9.1        | 86.4         | 0           |
| rs7765828  | 6    | GMPR             | G                 | 0.6208                           | -0.0931                                  | 40.9         | 27.3       | 27.3         | 4.5         |
| rs10499087 | 6    | SLC35F1-<br>PLN  | C                 | 0.7001                           | 0.1828                                   | 72.7         | 9.1        | 4.5          | 13.6        |
| rs11153730 | 6    | SLC35F1-<br>PLN  | C                 | 1.647                            | -0.565                                   | 40.9         | 9.1        | 45.5         | 4.5         |

|                   |    |                 |   |        |         |      |      |      |      |
|-------------------|----|-----------------|---|--------|---------|------|------|------|------|
| <b>rs12210733</b> | 6  | SLC35F1-<br>PLN | G | 2.036  | 0.6448  | 0    | 4.5  | 95.5 | 0    |
| <b>rs17349133</b> | 6  | SLC35F1-<br>PLN | C | 0.857  | -0.4496 | 0    | 36.4 | 54.5 | 9.1  |
| <b>rs465226</b>   | 6  | SLC35F1-<br>PLN | T | 1.844  | 0.1849  | 0    | 0    | 100  | 0    |
| <b>rs9920</b>     | 7  | CAV1            | C | 0.8447 | -0.1587 | 63.6 | 4.5  | 0    | 31.8 |
| <b>rs1805121</b>  | 7  | KCNH2           | C | 1.278  | NA      | 22.7 | 40.9 | 36.4 | 0    |
| <b>rs2072413</b>  | 7  | KCNH2           | C | 1.673  | -1.343  | 9.1  | 36.4 | 40.9 | 13.6 |
| <b>rs1961102</b>  | 8  | AZIN1           | T | 0.5836 | 0.3118  | 59.1 | 18.2 | 13.6 | 9.1  |
| <b>rs16936870</b> | 8  | NCOA2           | A | 0.9739 | 0.6432  | 77.3 | 18.2 | 4.5  | 0    |
| <b>rs2485376</b>  | 10 | GBF1            | G | 0.5629 | -0.0445 | 22.7 | 36.4 | 36.4 | 4.5  |
| <b>rs174583</b>   | 11 | FADS2           | C | 0.6575 | -0.6151 | 4.5  | 27.3 | 54.5 | 13.6 |
| <b>rs2074238</b>  | 11 | KCNQ1           | C | 4.94   | -3.112  | 0    | 9.1  | 90.9 | 0    |
| <b>rs7122937</b>  | 11 | KCNQ1           | T | 1.928  | 1.347   | 45.5 | 18.2 | 31.8 | 4.5  |
| <b>rs3026445</b>  | 12 | ATP2A2          | C | 0.5717 | 0.474   | 40.9 | 36.4 | 13.6 | 9.1  |
| <b>rs728926</b>   | 13 | KLF12           | T | 0.5746 | 0.3524  | 45.5 | 22.7 | 27.3 | 4.5  |
| <b>rs2273905</b>  | 14 | ANKRD9          | T | 0.6938 | 1.096   | 59.1 | 27.3 | 13.6 | 0    |
| <b>rs3105593</b>  | 15 | USP50-<br>TRPM7 | T | 0.67   | 0.9802  | 54.5 | 31.8 | 13.6 | 0    |
| <b>rs246258</b>   | 16 | CNOT1           | C | 1.732  | -1.392  | 0    | 31.8 | 50   | 18.2 |
| <b>rs4784934</b>  | 16 | CNOT1           | A | 0.6815 | 0.3654  | 63.6 | 18.2 | 9.1  | 9.1  |
| <b>rs1296720</b>  | 16 | CREBBP          | C | 0.834  | 0.5728  | 81.8 | 4.5  | 9.1  | 4.5  |
| <b>rs12444261</b> | 16 | LITAF           | G | 0.7988 | -0.888  | 4.5  | 22.7 | 68.2 | 4.5  |
| <b>rs735951</b>   | 16 | LITAF           | G | 1.156  | -1.436  | 27.3 | 36.4 | 22.7 | 13.6 |
| <b>rs246185</b>   | 16 | MKL2            | C | 0.7205 | 0.373   | 50   | 27.3 | 13.6 | 9.1  |
| <b>rs10775360</b> | 17 | KCNJ2           | C | 0.7672 | -0.2469 | 22.7 | 13.6 | 50   | 13.6 |
| <b>rs1396515</b>  | 17 | KCNJ2           | G | 0.9762 | -0.4522 | 13.6 | 13.6 | 54.5 | 18.2 |
| <b>rs17763769</b> | 17 | KCNJ2           | A | 0.8944 | -0.5354 | 77.3 | 13.6 | 4.5  | 4.5  |
| <b>rs236586</b>   | 17 | KCNJ2           | G | 0.6408 | 1.002   | 45.5 | 36.4 | 13.6 | 4.5  |
| <b>rs1052536</b>  | 17 | LIG3            | C | 0.9715 | 0.8081  | 22.7 | 22.7 | 27.3 | 27.3 |
| <b>rs9892651</b>  | 17 | PRKCA           | T | 0.7387 | -0.7171 | 31.8 | 27.3 | 22.7 | 18.2 |
| <b>rs1805128</b>  | 21 | KCNE1           | T | 1.014  | 14.18   | 100  | 0    | 0    | 0    |

**Supplementary Table 2: Baseline QTc vs. drug slope response by race**

| <b>Group</b>                          | <b><i>r</i> [95% CI]</b> | <b><i>P</i></b> | <b><i>N</i></b> | <b><i>r</i><sup>2</sup></b> |
|---------------------------------------|--------------------------|-----------------|-----------------|-----------------------------|
| <b>All Subjects</b>                   |                          |                 |                 |                             |
| Baseline QTc vs. Dofetilide QTc slope | 0.45 [0.03 to 0.73]      | 0.04            | 22              | 0.20                        |
| Baseline QTc vs. Quinidine QTc slope  | <0.01 [-0.46 to 0.40]    | 0.89            | 21              | <0.01                       |
| Baseline QTc vs. Ranolazine QTc slope | 0.18 [-0.26 to 0.56]     | 0.43            | 22              | 0.03                        |
| <b>White</b>                          |                          |                 |                 |                             |
| Baseline QTc vs. Dofetilide QTc slope | 0.38 [-0.13 to 0.73]     | 0.14            | 17              | 0.14                        |
| Baseline QTc vs. Quinidine QTc slope  | <0.01 [-0.53 to 0.46]    | 0.86            | 16              | <0.01                       |
| Baseline QTc vs. Ranolazine QTc slope | 0.03 [-0.46 to 0.50]     | 0.92            | 17              | <0.01                       |
| <b>Black</b>                          |                          |                 |                 |                             |
| Baseline QTc vs. Dofetilide QTc slope | 0.96 [-0.02 to 1.00]     | 0.04            | 4               | 0.92                        |
| Baseline QTc vs. Quinidine QTc slope  | 0.42 [-0.91 to 0.98]     | 0.58            | 4               | 0.17                        |
| Baseline QTc vs. Ranolazine QTc slope | 0.64 [-0.83 to 0.99]     | 0.36            | 4               | 0.41                        |

Asian group not reported because only 1 subject was Asian. Supplementary Figure I shows the corresponding correlation plots.

**Supplementary Table 3. Correlations between common genetic variant QT score and drug-induced  $T_{\text{peak}}-T_{\text{end}}$  slope response**

| <b>Genetic QT score vs. treatment<br/>(white subjects)</b>                     | <b><i>r</i> [95% CI]</b> | <b><i>P</i></b> | <b><i>N</i></b> | <b><i>r</i><sup>2</sup></b> |
|--------------------------------------------------------------------------------|--------------------------|-----------------|-----------------|-----------------------------|
| Genetic score vs. Baseline $T_{\text{peak}}-T_{\text{end}}$                    | 0.27 [-0.24 to 0.67]     | 0.29            | 17              | 0.07                        |
| Genetic score vs. Dofetilide $T_{\text{peak}}-T_{\text{end}}$ slope            | 0.13 [-0.37 to 0.58]     | 0.61            | 17              | 0.02                        |
| Genetic score vs. Quinidine $T_{\text{peak}}-T_{\text{end}}$ slope             | 0.27 [-0.26 to 0.68]     | 0.31            | 16              | 0.07                        |
| Genetic score vs. Ranolazine $T_{\text{peak}}-T_{\text{end}}$ slope            | 0.38 [-0.12 to 0.73]     | 0.13            | 17              | 0.14                        |
| <b>Genetic QT score vs. treatment<br/>(black or African American subjects)</b> | <b><i>r</i> [95% CI]</b> | <b><i>P</i></b> | <b><i>N</i></b> | <b><i>r</i><sup>2</sup></b> |
| Genetic score vs. Baseline $T_{\text{peak}}-T_{\text{end}}$                    | 0.87 [-0.56 to 1.00]     | 0.13            | 4               | 0.76                        |
| Genetic score vs. Dofetilide $T_{\text{peak}}-T_{\text{end}}$                  | 0.86 [-0.58 to 1.00]     | 0.14            | 4               | 0.74                        |
| Genetic score vs. Quinidine $T_{\text{peak}}-T_{\text{end}}$ slope             | <0.01 [-0.99 to 0.86]    | 0.41            | 4               | 0.35                        |
| Genetic score vs. Ranolazine $T_{\text{peak}}-T_{\text{end}}$ slope            | 0.94 [-0.24 to 1.00]     | 0.06            | 4               | 0.88                        |

**Supplementary Table 4: Baseline  $T_{\text{peak}}-T_{\text{end}}$  vs. drug QTc slope response by race**

| <b>Group</b>                                                       | <b><math>r</math> [95% CI]</b> | <b><math>P</math></b> | <b><math>N</math></b> | <b><math>r^2</math></b> |
|--------------------------------------------------------------------|--------------------------------|-----------------------|-----------------------|-------------------------|
| <b>All Subjects</b>                                                |                                |                       |                       |                         |
| Baseline $T_{\text{peak}}-T_{\text{end}}$ vs. Dofetilide QTc slope | 0.59 [0.23 to 0.81]            | <0.01                 | 22                    | 0.35                    |
| Baseline $T_{\text{peak}}-T_{\text{end}}$ vs. Quinidine QTc slope  | 0.78 [0.52 to 0.91]            | <0.001                | 21                    | 0.61                    |
| Baseline $T_{\text{peak}}-T_{\text{end}}$ vs. Ranolazine QTc slope | 0.37 [-0.06 to 0.69]           | 0.09                  | 22                    | 0.14                    |
| <b>White</b>                                                       |                                |                       |                       |                         |
| Baseline $T_{\text{peak}}-T_{\text{end}}$ vs. Dofetilide QTc slope | 0.65 [0.24 to 0.86]            | <0.01                 | 17                    | 0.42                    |
| Baseline $T_{\text{peak}}-T_{\text{end}}$ vs. Quinidine QTc slope  | 0.80 [0.50 to 0.93]            | <0.001                | 16                    | 0.64                    |
| Baseline $T_{\text{peak}}-T_{\text{end}}$ vs. Ranolazine QTc slope | 0.41 [-0.09 to 0.74]           | 0.11                  | 17                    | 0.17                    |
| <b>Black</b>                                                       |                                |                       |                       |                         |
| Baseline $T_{\text{peak}}-T_{\text{end}}$ vs. Dofetilide QTc slope | 0.96[-0.07 to 1.00]            | 0.05                  | 4                     | 0.91                    |
| Baseline $T_{\text{peak}}-T_{\text{end}}$ vs. Quinidine QTc slope  | 0.17 [-0.95 to 0.97]           | 0.83                  | 4                     | 0.03                    |
| Baseline $T_{\text{peak}}-T_{\text{end}}$ vs. Ranolazine QTc slope | 0.11 [-0.95 to 0.97]           | 0.89                  | 4                     | 0.01                    |

*Asian group not reported because only 1 subject was Asian.*

**Supplementary Table 5: Baseline  $T_{\text{peak}}-T_{\text{end}}$  vs. drug  $T_{\text{peak}}-T_{\text{end}}$  slope response by race**

| <b>Group</b>                                                                                    | <b><math>r</math> [95% CI]</b> | <b><math>P</math></b> | <b><math>N</math></b> | <b><math>r^2</math></b> |
|-------------------------------------------------------------------------------------------------|--------------------------------|-----------------------|-----------------------|-------------------------|
| <b>All Subjects</b>                                                                             |                                |                       |                       |                         |
| Baseline $T_{\text{peak}}-T_{\text{end}}$ vs. Dofetilide $T_{\text{peak}}-T_{\text{end}}$ slope | 0.72 [0.43 to 0.88]            | <0.001                | 22                    | 0.52                    |
| Baseline $T_{\text{peak}}-T_{\text{end}}$ vs. Quinidine $T_{\text{peak}}-T_{\text{end}}$ slope  | 0.66 [0.33 to 0.85]            | <0.01                 | 21                    | 0.44                    |
| Baseline $T_{\text{peak}}-T_{\text{end}}$ vs. Ranolazine $T_{\text{peak}}-T_{\text{end}}$ slope | 0.50 [0.10 to 0.76]            | 0.02                  | 22                    | 0.25                    |
| <b>White</b>                                                                                    |                                |                       |                       |                         |
| Baseline $T_{\text{peak}}-T_{\text{end}}$ vs. Dofetilide $T_{\text{peak}}-T_{\text{end}}$ slope | 0.69 [0.31 to 0.88]            | <0.01                 | 17                    | 0.47                    |
| Baseline $T_{\text{peak}}-T_{\text{end}}$ vs. Quinidine $T_{\text{peak}}-T_{\text{end}}$ slope  | 0.69 [0.30 to 0.89]            | <0.01                 | 16                    | 0.48                    |
| Baseline $T_{\text{peak}}-T_{\text{end}}$ vs. Ranolazine $T_{\text{peak}}-T_{\text{end}}$ slope | 0.40 [-0.10 to 0.74]           | 0.12                  | 17                    | 0.16                    |
| <b>Black</b>                                                                                    |                                |                       |                       |                         |
| Baseline $T_{\text{peak}}-T_{\text{end}}$ vs. Dofetilide $T_{\text{peak}}-T_{\text{end}}$ slope | 1.00[0.88 to 1.00]             | 0<0.01                | 4                     | 0.99                    |
| Baseline $T_{\text{peak}}-T_{\text{end}}$ vs. Quinidine $T_{\text{peak}}-T_{\text{end}}$ slope  | <0.01 [-0.98 to 0.92]          | 0.65                  | 4                     | 0.13                    |
| Baseline $T_{\text{peak}}-T_{\text{end}}$ vs. Ranolazine $T_{\text{peak}}-T_{\text{end}}$ slope | 0.89 [-0.50 to 1.00]           | 0.11                  | 4                     | 0.79                    |

*Asian group not reported because only 1 subject was Asian.*

**Supplementary Table 6. Association results for individual torsade de pointes variants from the QT interval score.** Variants with imputation quality scores > 0.9 were included in the QT score analysis.

| SNP        | CHR | position (hg19) | coded allele | coded allele freq | effect (ln(OR)) | SE   | P     | imputed | imputation quality |
|------------|-----|-----------------|--------------|-------------------|-----------------|------|-------|---------|--------------------|
| rs2273042  | 1   | 6149122         | A            | 0.12              | -0.22           | 0.19 | 0.256 | 0       | 1.00               |
| rs846111   | 1   | 6279370         | C            | 0.19              | -0.18           | 0.22 | 0.422 | 1       | 0.76               |
| rs2298632  | 1   | 23710475        | C            | 0.49              | -0.12           | 0.12 | 0.289 | 0       | 1.00               |
| rs6669543  | 1   | 161981025       | T            | 0.24              | -0.07           | 0.14 | 0.608 | 1       | 0.94               |
| rs4656345  | 1   | 161991237       | NA           | NA                | NA              | NA   | NA    | NA      | NA                 |
| rs12143842 | 1   | 162033890       | T            | 0.27              | 0.30            | 0.13 | 0.020 | 0       | 0.98               |
| rs16857031 | 1   | 162112910       | G            | 0.15              | 0.11            | 0.16 | 0.493 | 1       | 0.58               |
| rs17457880 | 1   | 162168154       | A            | 0.01              | -0.62           | 0.58 | 0.288 | 1       | 1.00               |
| rs4657172  | 1   | 162179632       | C            | 0.11              | -0.24           | 0.20 | 0.231 | 1       | 0.99               |
| rs3934467  | 1   | 162182677       | T            | 0.22              | 0.12            | 0.14 | 0.390 | 1       | 0.99               |
| rs7545047  | 1   | 162191103       | A            | 0.05              | -0.11           | 0.28 | 0.684 | 1       | 0.59               |
| rs17460657 | 1   | 162261826       | C            | 0.02              | 0.41            | 0.42 | 0.331 | 1       | 0.99               |
| rs347272   | 1   | 162318498       | A            | 0.14              | 0.41            | 0.17 | 0.015 | 1       | 1.00               |
| rs164133   | 1   | 162381288       | C            | 0.27              | -0.11           | 0.13 | 0.418 | 1       | 1.00               |
| rs545833   | 1   | 168689940       | T            | 0.28              | 0.28            | 0.13 | 0.039 | 0       | 1.00               |
| rs12061601 | 1   | 169070450       | C            | 0.11              | -0.23           | 0.20 | 0.242 | 0       | 1.00               |
| rs10919070 | 1   | 169099037       | C            | 0.13              | -0.28           | 0.19 | 0.143 | 1       | 0.99               |
| rs12079745 | 1   | 169101060       | A            | 0.05              | -0.20           | 0.28 | 0.471 | 1       | 1.00               |
| rs1983546  | 1   | 169446183       | G            | 0.35              | -0.13           | 0.12 | 0.289 | 0       | 0.99               |
| rs6544311  | 2   | 40353277        | A            | 0.39              | 0.37            | 0.13 | 0.003 | 1       | 1.00               |
| rs12997023 | 2   | 40752982        | C            | 0.04              | -0.21           | 0.33 | 0.525 | 1       | 0.99               |
| rs938291   | 2   | 174742608       | G            | 0.38              | -0.05           | 0.12 | 0.671 | 1       | 1.00               |
| rs7561149  | 2   | 179689856       | C            | 0.40              | -0.07           | 0.12 | 0.551 | 1       | 1.00               |
| rs295140   | 2   | 201160699       | T            | 0.43              | 0.07            | 0.12 | 0.552 | 0       | 0.99               |
| rs6793245  | 3   | 38599037        | A            | 0.31              | -0.20           | 0.13 | 0.134 | 1       | 1.00               |
| rs11708996 | 3   | 38633923        | C            | 0.14              | 0.02            | 0.17 | 0.884 | 1       | 0.94               |
| rs11710077 | 3   | 38657899        | T            | 0.20              | 0.44            | 0.15 | 0.004 | 1       | 0.98               |
| rs6599234  | 3   | 38715300        | A            | 0.30              | 0.03            | 0.13 | 0.801 | 1       | 1.00               |
| rs6801957  | 3   | 38767315        | T            | 0.41              | 0.08            | 0.12 | 0.525 | 1       | 1.00               |
| rs17784882 | 3   | 47544003        | A            | 0.41              | 0.08            | 0.12 | 0.504 | 0       | 1.00               |
| rs2363719  | 4   | 72138216        | A            | 0.11              | 0.10            | 0.19 | 0.581 | 0       | 1.00               |
| rs3857067  | 4   | 95026434        | A            | 0.49              | -0.05           | 0.12 | 0.670 | 1       | 1.00               |
| rs10040989 | 5   | 137573725       | A            | 0.13              | -0.21           | 0.19 | 0.275 | 0       | 0.95               |
| rs7765828  | 6   | 16294722        | G            | 0.37              | 0.06            | 0.13 | 0.624 | 1       | 1.00               |
| rs457162   | 6   | 118535983       | T            | 0.05              | 0.62            | 0.25 | 0.012 | 1       | 1.00               |
| rs12210733 | 6   | 118653075       | A            | 0.06              | 0.07            | 0.25 | 0.775 | 1       | 1.00               |
| rs11153730 | 6   | 118667522       | C            | 0.49              | 0.25            | 0.12 | 0.038 | 1       | 1.00               |



|            |    |           |    |      |       |      |       |    |      |
|------------|----|-----------|----|------|-------|------|-------|----|------|
| rs3902035  | 6  | 119000232 | C  | 0.32 | 0.03  | 0.12 | 0.835 | 1  | 1.00 |
| rs9489510  | 6  | 119043898 | G  | 0.32 | 0.18  | 0.13 | 0.172 | 0  | 1.00 |
| rs9920     | 7  | 116200092 | C  | 0.10 | -0.03 | 0.20 | 0.885 | 0  | 1.00 |
| rs2072413  | 7  | 150647969 | NA | NA   | NA    | NA   | NA    | NA | NA   |
| rs3807375  | 7  | 150667210 | T  | 0.37 | 0.08  | 0.12 | 0.495 | 1  | 0.99 |
| rs16936870 | 8  | 71189342  | A  | 0.10 | 0.12  | 0.20 | 0.552 | 1  | 1.00 |
| rs11779860 | 8  | 98850330  | C  | 0.46 | -0.06 | 0.12 | 0.624 | 0  | 1.00 |
| rs1961102  | 8  | 103932845 | T  | 0.35 | 0.08  | 0.12 | 0.537 | 1  | 0.52 |
| rs2485376  | 10 | 104050006 | A  | 0.37 | -0.05 | 0.13 | 0.674 | 1  | 0.82 |
| rs2301696  | 11 | 2426984   | C  | 0.47 | 0.02  | 0.26 | 0.930 | 1  | 0.98 |
| rs2074238  | 11 | 2484803   | T  | 0.06 | -0.24 | 0.29 | 0.403 | 1  | 0.98 |
| rs7122937  | 11 | 2486550   | T  | 0.19 | 0.33  | 0.15 | 0.026 | 1  | 1.00 |
| rs174583   | 11 | 61609750  | T  | 0.36 | -0.03 | 0.12 | 0.804 | 0  | 1.00 |
| rs3026445  | 12 | 110723203 | C  | 0.36 | 0.07  | 0.13 | 0.550 | 0  | 0.98 |
| rs728926   | 13 | 74513122  | T  | 0.39 | 0.11  | 0.12 | 0.384 | 1  | 1.00 |
| rs2273905  | 14 | 102974999 | T  | 0.35 | 0.05  | 0.12 | 0.655 | 0  | 1.00 |
| rs3105593  | 15 | 50845018  | T  | 0.47 | 0.04  | 0.12 | 0.736 | 0  | 0.95 |
| rs1296720  | 16 | 3873642   | C  | 0.21 | 0.12  | 0.15 | 0.402 | 1  | 1.00 |
| rs12930096 | 16 | 11670758  | T  | 0.17 | -0.14 | 0.16 | 0.379 | 0  | 0.95 |
| rs735951   | 16 | 11693536  | A  | 0.46 | -0.19 | 0.12 | 0.114 | 1  | 0.96 |
| rs12444261 | 16 | 11734642  | T  | 0.24 | 0.02  | 0.15 | 0.872 | 1  | 0.99 |
| rs246185   | 16 | 14395432  | C  | 0.32 | 0.06  | 0.13 | 0.662 | 1  | 1.00 |
| rs4784934  | 16 | 58459926  | A  | 0.28 | 0.13  | 0.13 | 0.311 | 1  | 1.00 |
| rs246196   | 16 | 58574253  | C  | 0.26 | 0.01  | 0.14 | 0.954 | 1  | 1.00 |
| rs1052536  | 17 | 33331575  | T  | 0.48 | -0.19 | 0.12 | 0.125 | 0  | 0.99 |
| rs9892651  | 17 | 64303793  | C  | 0.42 | 0.15  | 0.12 | 0.199 | 1  | 1.00 |
| rs236586   | 17 | 68203546  | G  | 0.48 | 0.15  | 0.12 | 0.219 | 1  | 1.00 |
| rs10775360 | 17 | 68325868  | T  | 0.29 | -0.22 | 0.13 | 0.091 | 1  | 1.00 |
| rs1396515  | 17 | 68430993  | G  | 0.48 | -0.05 | 0.12 | 0.679 | 0  | 1.00 |
| rs17763769 | 17 | 68560789  | A  | 0.14 | 0.04  | 0.17 | 0.822 | 0  | 1.00 |
| rs1805128  | 21 | 35821680  | NA | NA   | NA    | NA   | NA    | NA | NA   |

**Supplementary Table 7. Effects on QTc slope of genetic QT score using 61 SNPs at 31 loci (full) and restricted to 1 SNP per locus (index only)**

| <i>Treatment</i>            | <i>N</i> | <i>Genetic QT score (white subjects)</i> |                       |                   |                       |
|-----------------------------|----------|------------------------------------------|-----------------------|-------------------|-----------------------|
|                             |          | <i>Full</i>                              |                       | <i>Index only</i> |                       |
|                             |          | <i>P</i>                                 | <i>r</i> <sup>2</sup> | <i>P</i>          | <i>r</i> <sup>2</sup> |
| <i>Baseline QTc</i>         | 17       | 0.03                                     | 0.27                  | 0.10              | 0.17                  |
| <i>Dofetilide QTc slope</i> | 17       | 0.02                                     | 0.30                  | 0.19              | 0.11                  |
| <i>Quinidine QTc slope</i>  | 16       | 0.06                                     | 0.23                  | 0.45              | 0.04                  |
| <i>Ranolazine QTc slope</i> | 17       | 0.03                                     | 0.27                  | 0.42              | 0.04                  |

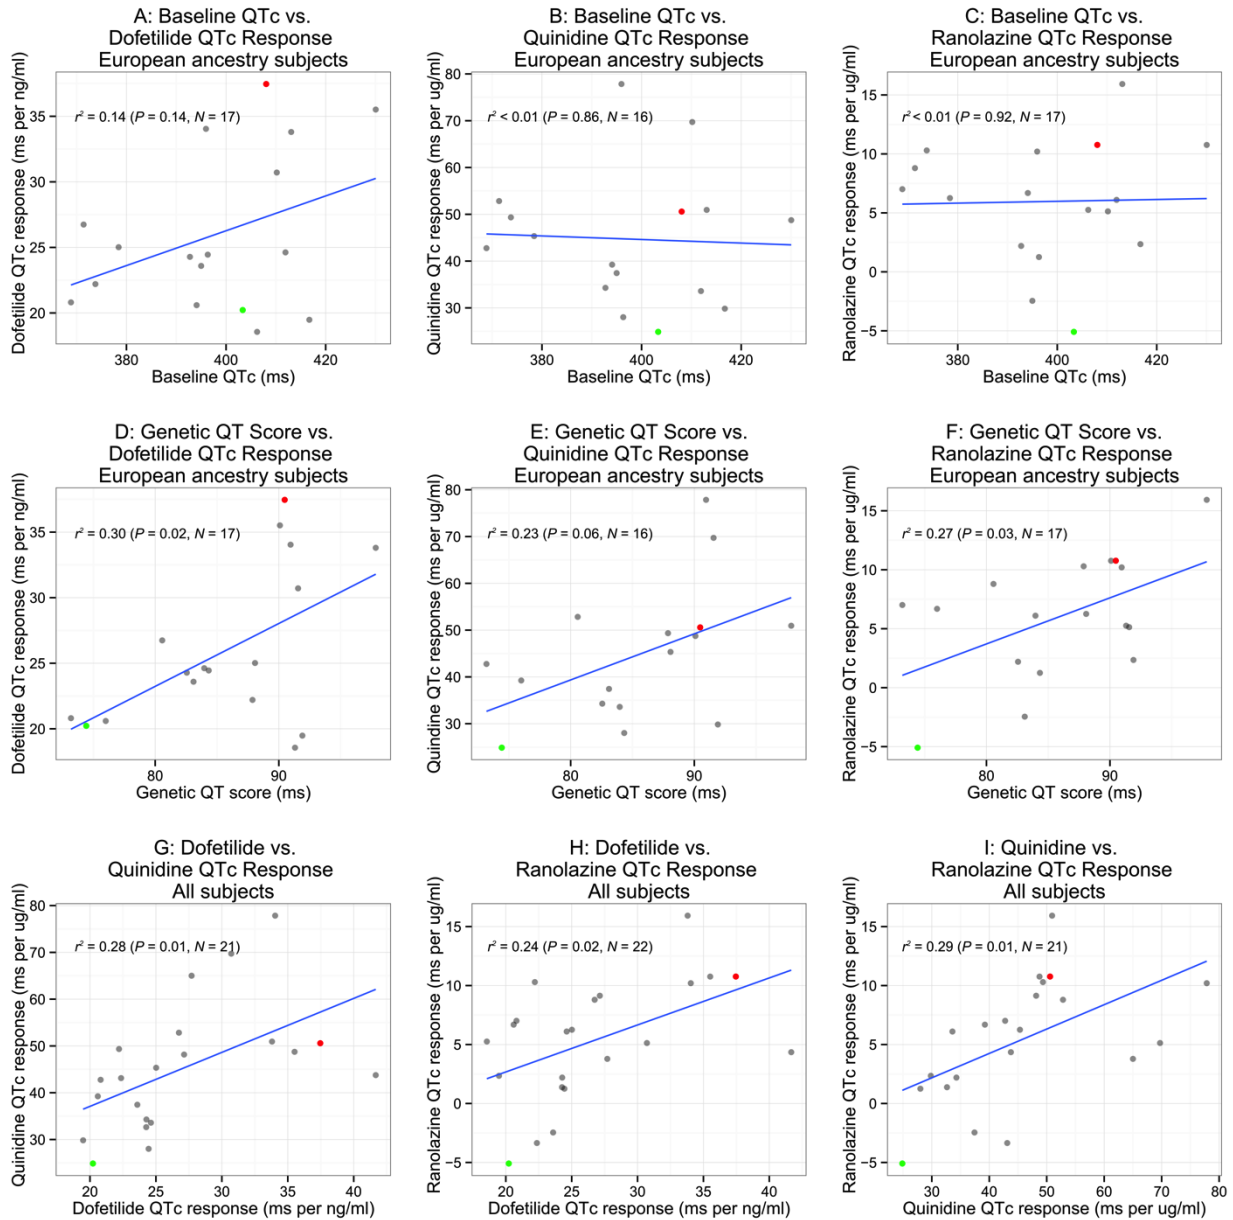

**Supplementary Figure 1:** Correlations between baseline QTc and QTc slope, genetic score and QTc slope as well as QTc slope between drugs. Correlation between baseline QTc and QTc slope of dofetilide (A), quinidine (B) and ranolazine (C) in white subjects. Correlation between European ancestry genetic QT score and QTc slope of dofetilide (D), quinidine (E) and ranolazine (F) in white subjects. Correlation between dofetilide and quinidine QTc slopes (G), dofetilide and ranolazine QTc slope (H) and quinidine and ranolazine QTc slopes (I). All correlations computed in white subjects. Each dot corresponds with a subject. Example subjects are shown in red (dofetilide high responder) and green (low responder).

**Supplementary Figure 2. Sensitivity analysis of genotype score in cases of drug-induced torsade de pointes.** Instrumental variable analysis of effect of 31 SNPs associated with resting QTc (restricted to only one SNP per locus), using effect estimates from the QT-IGC GWA study (x axis) in milliseconds of QT interval per allele as a predictor of log odds ratio of diTdp (y axis). Individual labels represent SNPs used in the analysis, and error bars correspond to the standard error of the log odds ratio of drug-induced torsade de pointes.

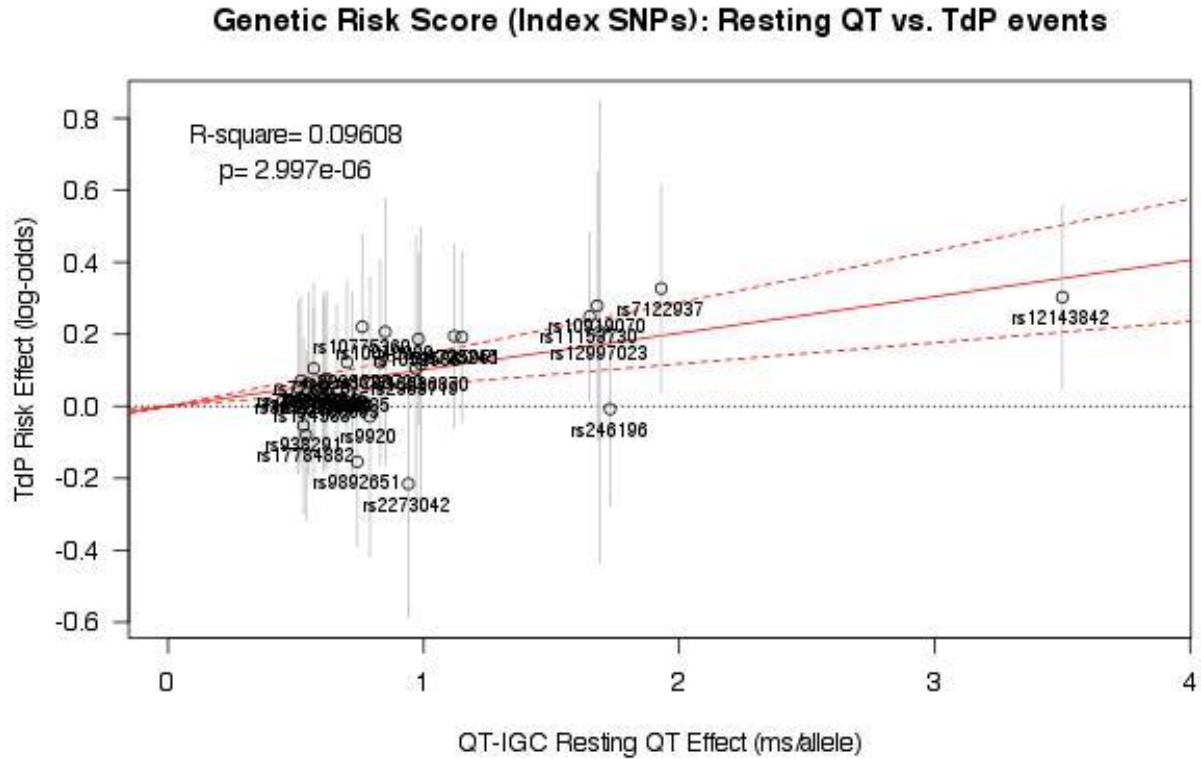

Supplement: NIHMS853131-supplement-Supplemental_PDF.pdf [file NIHMS853131-supplement-Supplemental_PDF.pdf]
